# Supplementary material
Source: PubMed Central journal article supplement (PMC7148198)
Supplement: NIHMS1066430-supplement-Supplemental_Material_1.pdf [file NIHMS1066430-supplement-Supplemental_Material_1.pdf]

**Supplemental Figure 1. Adjusted Estimated Marginal Means by Gender and Sexual Orientation**

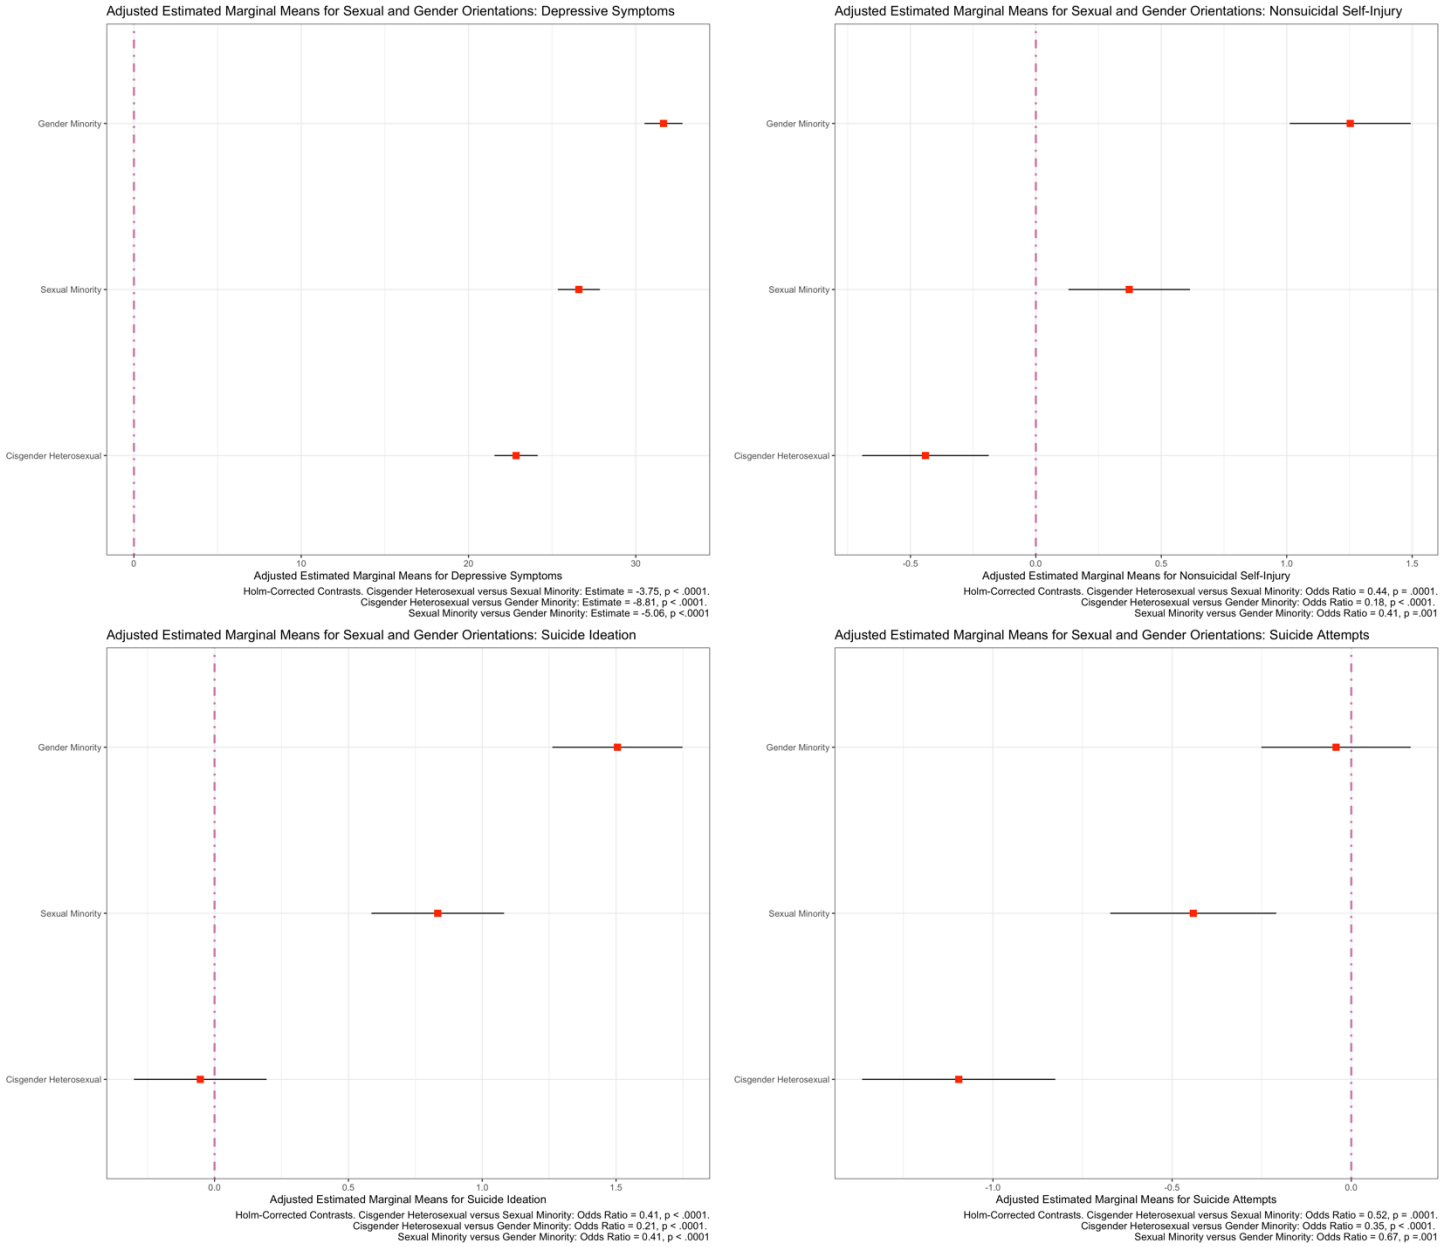

Note. Estimated marginal means adjusted by gender assigned at birth, subjective social status, and age.
