# Supplementary material
Source: PubMed Central journal article supplement (PMC7148198)
Supplement: NIHMS1066430-supplement-Supplemental_Material_2.pdf [file NIHMS1066430-supplement-Supplemental_Material_2.pdf]

**Supplemental Figure 2. Adjusted Estimated Marginal Means by Race**

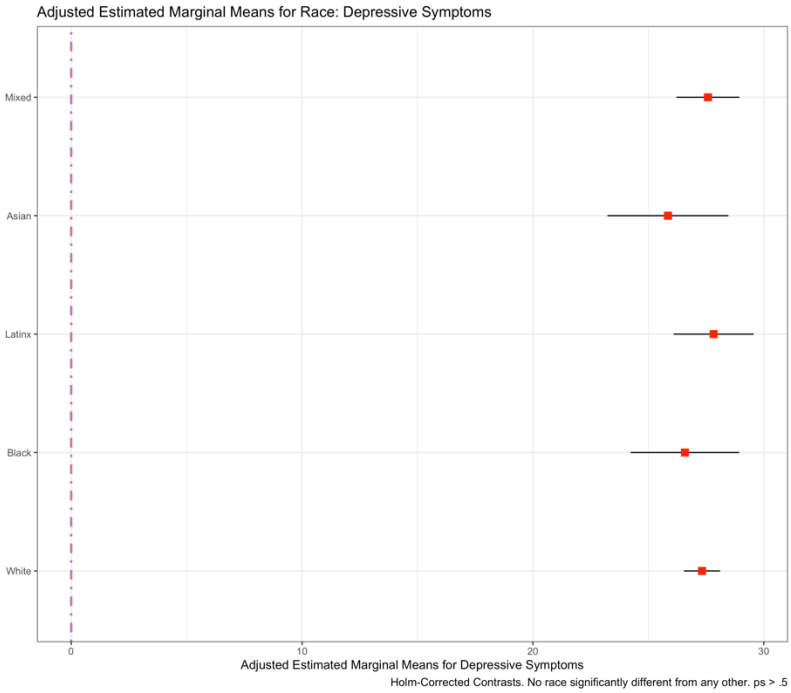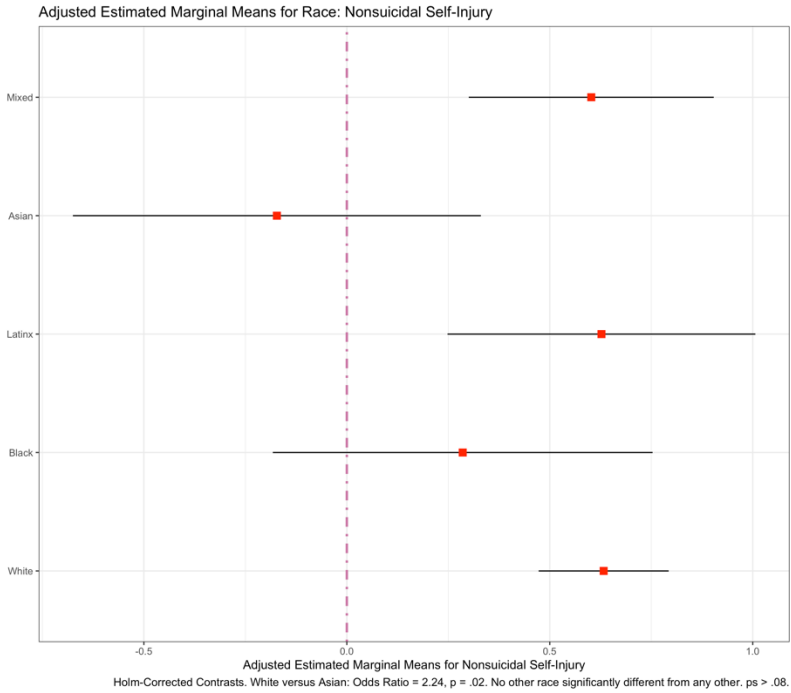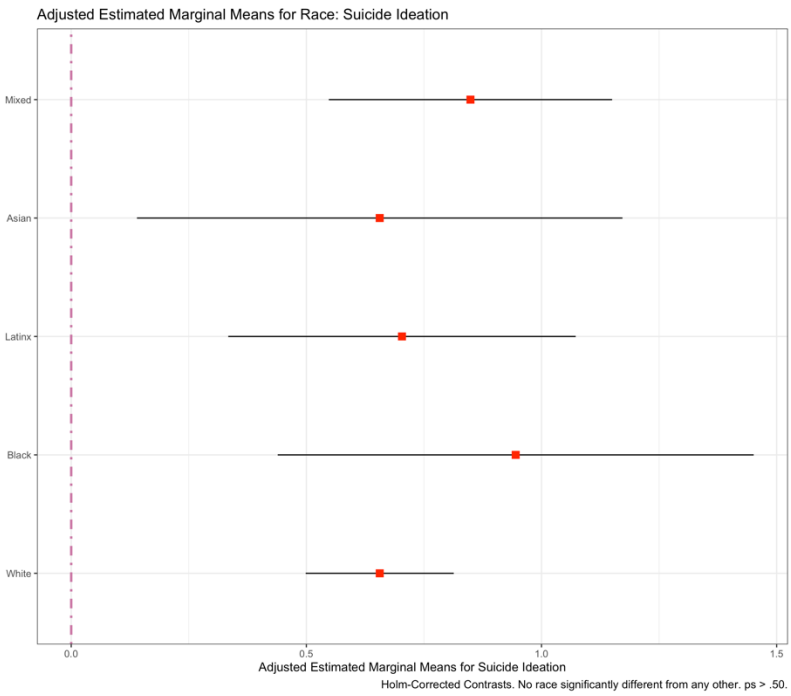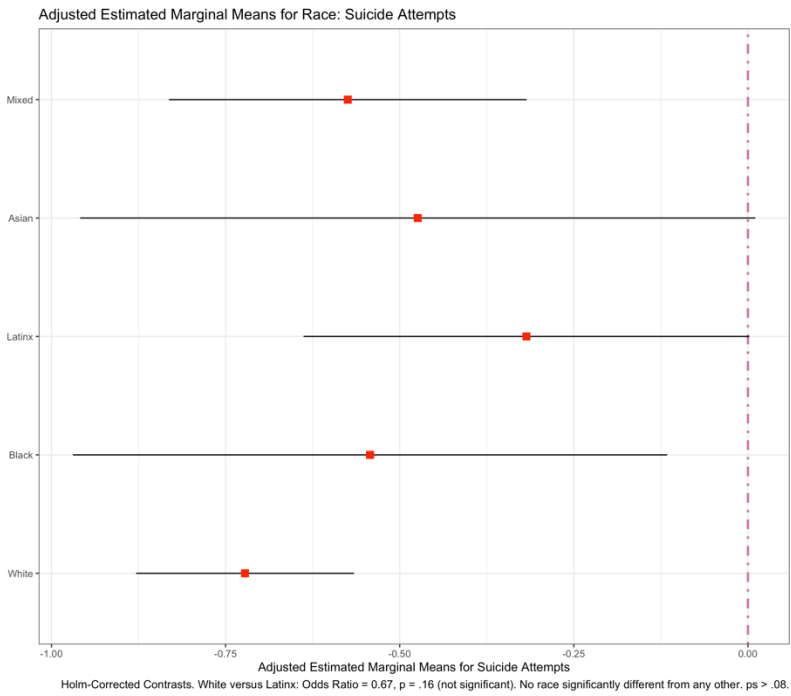

Note: Means adjusted by gender assigned at birth, subjective social status, and age
