# Supplementary material
Source: PubMed Central journal article supplement (PMC7148198)
Supplement: NIHMS1066430-supplement-Supplemental_Material_3.pdf [file NIHMS1066430-supplement-Supplemental_Material_3.pdf]

Supplemental Figure 3. Bullying/Discrimination and Family Support

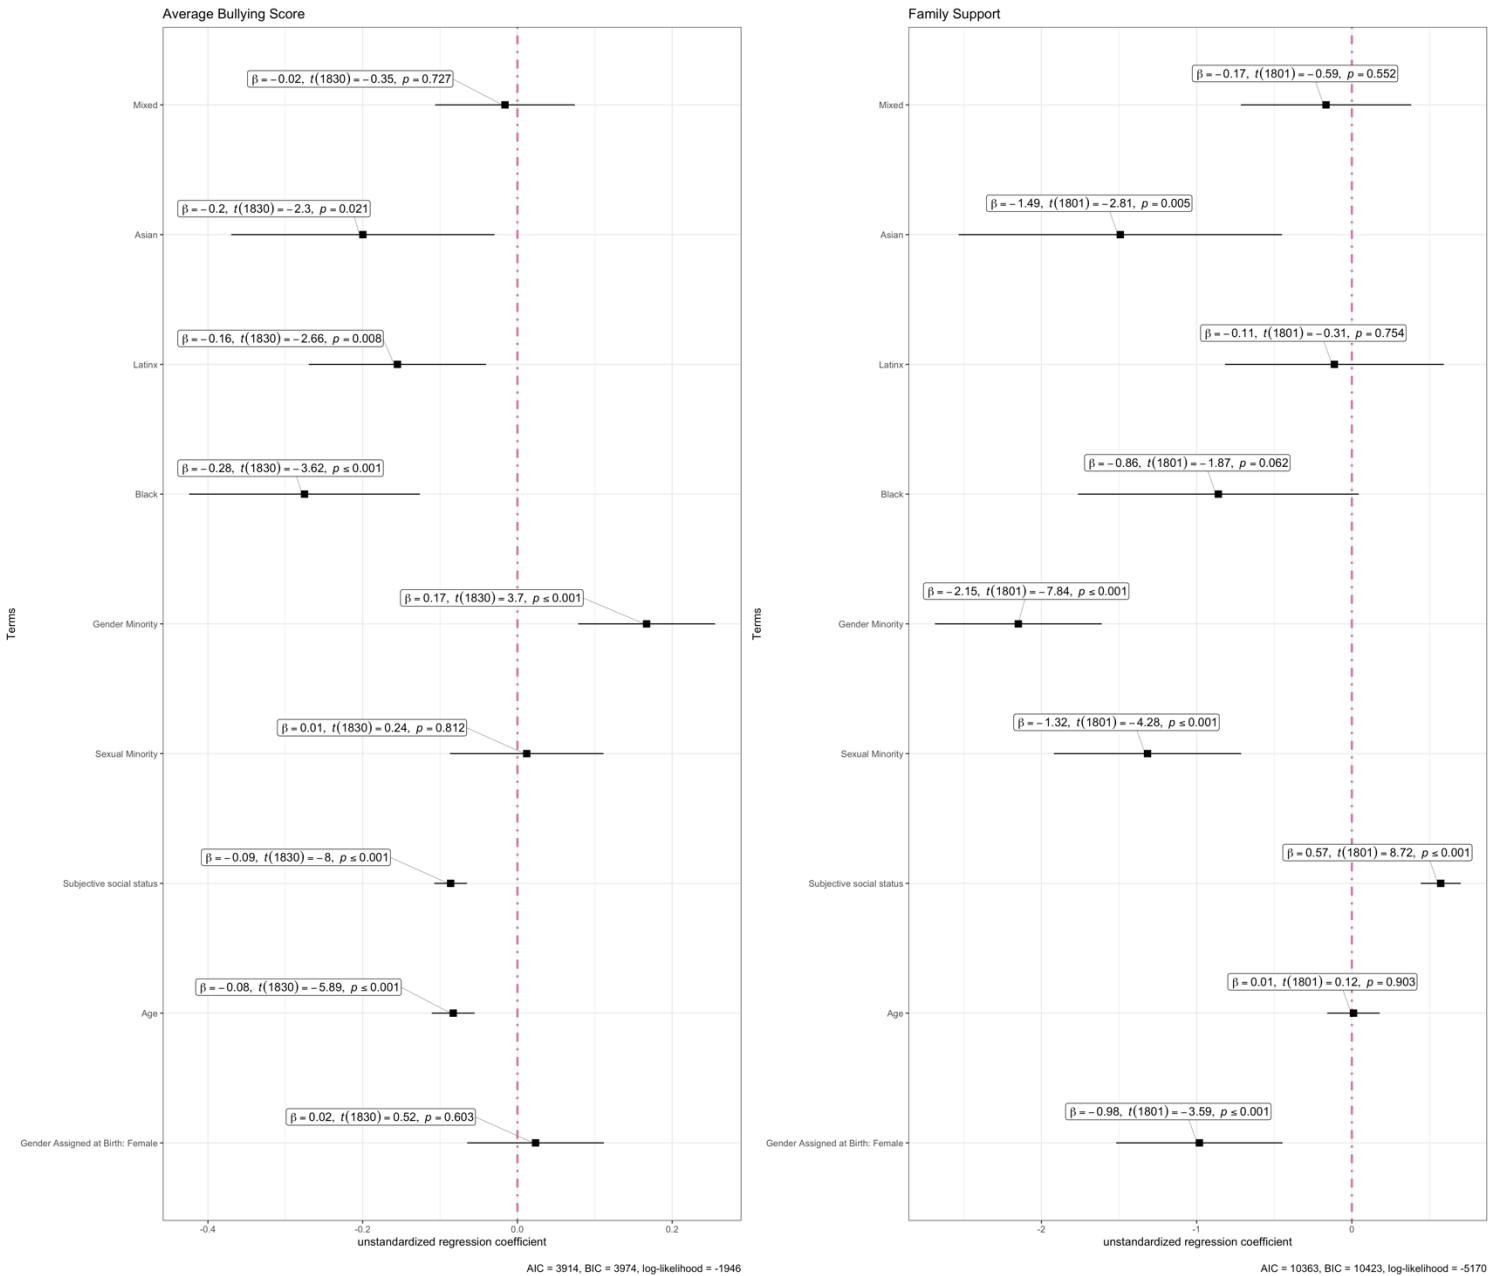

Note. Family Support and Bully Models (respectively) include: Cisgender heterosexual: White (221, 223), Black (21, 21), Hispanic (36, 37) Asian (19, 19), Mixed (54, 46); Sexual Minority: White (269, 272), Black (32, 33), Hispanic (42, 43), Asian (23, 24), Mixed (61, 62); Gender Minority: White (724, 734), Black (38, 38), Hispanic (81, 86), Asian (25, 26), Mixed (177, 179). The 1,814 and 1,843 participants included in these analyses reported that they were significantly older, more likely to be assigned female at birth, and more likely to identify as a sexual minority than the full study sample.
